# Supplementary material for: HPV infection and the genital cytokine milieu in women at high risk of HIV acquisition
Source: PubMed Central journal article supplement (PMC6863918; doi:10.1038/s41467-019-13089-2), 2019-11-19
Supplement: 41467_2019_13089_MOESM1_ESM.pdf [file 41467_2019_13089_MOESM1_ESM.pdf]

## Supplementary Information Data

### HPV infection and the genital cytokine milieu in women at high risk of HIV acquisition, Liebenberg et al.

**Supplementary Figure 1. Sensitivity analysis of HPV infection and genital cytokines in the presence of other current STIs.** Comparisons reflect mean differences in cytokine concentrations in women who acquired any HPV type relative to women who remained HPV negative either (a) in the entire cohort, controlling only for STI symptoms and not laboratory detection of STIs (N=494 women; 404 Any Acquired visits and 173 Remained Negative visits), or in a subset of women with laboratory measures of current STI available (N=280 women; 198 Any Acquired visits and 161 Remained Negative events) and either (b) not controlling for current STI, or (c) controlling for current STI. Individual associations are shown between HPV status and pro-inflammatory cytokines (red), chemokines (blue), growth/hematopoietic factors (green), adaptive response cytokines (purple) and regulatory cytokines (orange), with error bars depicting 95% confidence intervals. The models test the hypothesis that the mean cytokine levels in comparator groups are equal i.e.  $\beta=0$ . The dotted line at  $\beta=0$  distinguishes higher (to the right of the line) from lower (to the left of the line) mean cytokine differences in the respective categories relative to the remained HPV negative group. Grey shadings represent genital cytokines previously associated with HIV risk in this cohort: IP-10, IL-8, MIP-1 $\alpha$  and MIP-1 $\beta$ . Filled shapes represent significant associations after FDR adjustment using a threshold of 0.05 in multivariable models controlling for baseline treatment group, age, age of sexual debut, number of sexual partners number of sex acts (past 30 days), presence of STI symptoms, HSV-2 status, condom use, marital status, and whether women were living with regular partners.

### Supplementary Table 1. HIV incidence by prevalent HPV type

### Supplementary Table 2. Characteristics of women who remained HPV negative, and who acquired, cleared or retained HPV infection

### Supplementary Table 3. Tenofovir concentrations and the incidence, clearance and persistence of HPV.

**ANY HPV ACQUIRED IN COHORT**  
(Unadjusted for Laboratory STI data)  
N=404 Visits

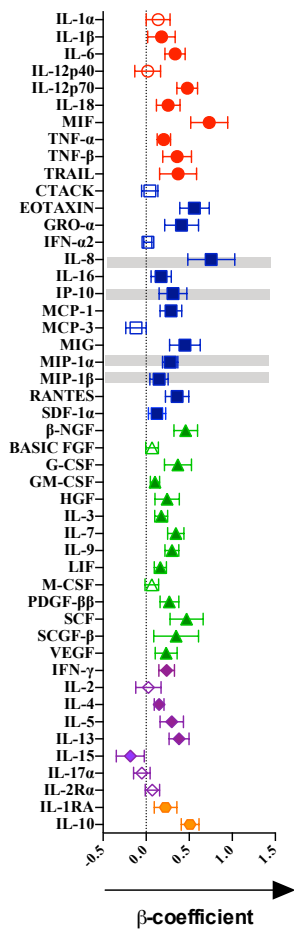

**ANY HPV ACQUIRED IN WOMEN WITH LABORATORY STI DATA**  
(Unadjusted for Laboratory STI data)  
N=198 Visits

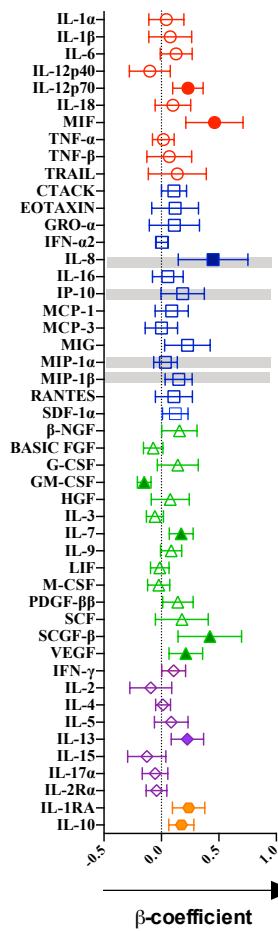

**ANY HPV ACQUIRED IN WOMEN WITH LABORATORY STI DATA**  
(Adjusted for Laboratory STI data)  
N=198 Visits

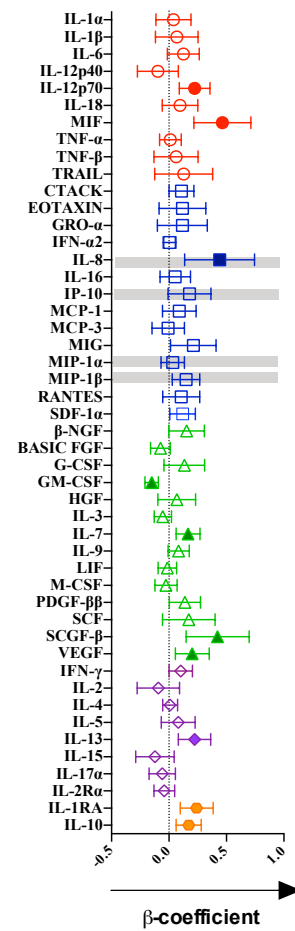

**Supplementary Figure 1. Sensitivity analysis of HPV infection and genital cytokines in the presence of other current STIs.**

**Supplementary Table 1. HIV incidence by prevalent HPV type**

|            | IARC cat# | HPV vaccine types* | Women Years (N) | # HIV Events | HIV IR/100wy (95% CI) | HR (95% CI)     | p-value | False Discovery |
|------------|-----------|--------------------|-----------------|--------------|-----------------------|-----------------|---------|-----------------|
| HPV1S39    | 2B        |                    | 27.3 (19)       | 5            | 18.3 (5.9-42.7)       | 10.2 (2.6-39.8) | 0.001   | 0.016           |
| HPV69      | 2B        |                    | 27.7 (22)       | 5            | 18.1 (5.9-42.2)       | 5.8 (1.6-21.1)  | 0.009   | 0.048           |
| HPV59      | 1         |                    | 69.1 (48)       | 11           | 15.9 (7.9-28.5)       | 6.7 (2.4-18.5)  | <0.001  | 0.009           |
| HPV82      | 2B        |                    | 40.2 (26)       | 5            | 12.4 (4.0-29.0)       | 2.7 (0.8-9.8)   | 0.123   | 0.185           |
| HPV51      | 1         |                    | 116.3 (76)      | 14           | 12 (6.6-20.2)         | 4.5 (1.6-12.2)  | 0.004   | 0.042           |
| HPV68      | 2A        |                    | 61.7 (41)       | 7            | 11.3 (4.6-23.4)       | 4.8 (1.6-14.6)  | 0.006   | 0.048           |
| HPV35      | 1         |                    | 107.0 (73)      | 12           | 11.2 (5.8-19.6)       | 3.7 (1.4-10.0)  | 0.009   | 0.048           |
| HPV11      | 3         | 4,9                | 27.1 (20)       | 3            | 11.1 (2.3-32.3)       | 3.1 (0.7-14.1)  | 0.137   | 0.197           |
| HPV71      | 3         |                    | 38.5 (27)       | 4            | 10.4 (2.8-26.6)       | 3.6 (0.9-15.2)  | 0.078   | 0.147           |
| HPV67      | 2B        |                    | 49.7 (31)       | 5            | 10.1 (3.3-23.5)       | 3.7 (1.1-12.4)  | 0.034   | 0.112           |
| HPV33      | 1         | 9                  | 85.5 (53)       | 8            | 9.4 (4.0-18.4)        | 3.7 (1.3-10.8)  | 0.017   | 0.078           |
| HPV66      | 2B        |                    | 65.0 (43)       | 6            | 9.2 (3.4-20.1)        | 3.4 (1.0-11.3)  | 0.05    | 0.119           |
| HPV61      | 3         |                    | 68.0 (46)       | 6            | 8.8 (3.2-19.2)        | 3.5 (1.0-12.2)  | 0.047   | 0.119           |
| HPVCP6 108 | 3         |                    | 57.3 (40)       | 5            | 8.7 (2.8-20.4)        | 3.6 (1.0-13.0)  | 0.047   | 0.119           |
| HPV83      | 3         |                    | 58.4 (39)       | 5            | 8.6 (2.8-20.0)        | 3.5 (0.9-13.2)  | 0.063   | 0.134           |
| HPV84      | 3         |                    | 141.0 (91)      | 12           | 8.5 (4.4-14.9)        | 2.9 (1.1-7.4)   | 0.028   | 0.111           |
| HPV16      | 1         | 2,4,9              | 129.7 (84)      | 11           | 8.5 (4.2-15.2)        | 3.1 (1.1-8.5)   | 0.031   | 0.111           |
| HPV58      | 1         | 9                  | 108.5 (70)      | 9            | 8.3 (3.8-15.7)        | 3.9 (1.4-10.9)  | 0.009   | 0.048           |
| HPV55      | 3         |                    | 48.3 (31)       | 4            | 8.3 (2.3-21.2)        | 3.2 (0.9-11.7)  | 0.075   | 0.147           |
| HPV70      | 2B        |                    | 61.3 (41)       | 5            | 8.2 (2.7-19.0)        | 3.4 (1.1-10.8)  | 0.041   | 0.119           |
| HPV40      | 3         |                    | 25.6 (16)       | 2            | 7.8 (0.9-28.3)        | 5.5 (0.7-43.4)  | 0.107   | 0.169           |
| HPV45      | 1         | 9                  | 64.9 (43)       | 5            | 7.7 (2.5-18.0)        | 2.9 (0.8-10.0)  | 0.100   | 0.169           |
| HPV39      | 1         |                    | 66.5 (42)       | 5            | 7.5 (2.4-17.5)        | 3.0 (0.9-10.3)  | 0.082   | 0.148           |
| HPV81      | 3         |                    | 57.5 (37)       | 4            | 7 (1.9-17.8)          | 3.5 (1.0-12.6)  | 0.054   | 0.121           |
| HPV42      | 3         |                    | 48.4 (31)       | 3            | 6.2 (1.3-18.1)        | 1.6 (0.3-7.7)   | 0.546   | 0.596           |
| HPV06      | 3         | 4,9                | 50.5 (33)       | 3            | 5.9 (1.2-17.4)        | 3.7 (0.8-17.7)  | 0.108   | 0.169           |
| HPV56      | 1         |                    | 34.5 (23)       | 2            | 5.8 (0.7-20.9)        | 3.0 (0.5-17.3)  | 0.212   | 0.282           |
| HPV31      | 1         | 9                  | 73.5 (48)       | 4            | 5.4 (1.5-13.9)        | 1.7 (0.4-6.4)   | 0.449   | 0.521           |
| HPV52      | 1         | 9                  | 74.5 (47)       | 4            | 5.4 (1.5-13.7)        | 2.0 (0.5-7.8)   | 0.298   | 0.383           |
| HPV54      | 3         |                    | 57.2 (38)       | 3            | 5.2 (1.1-15.3)        | 2.6 (0.6-11.0)  | 0.209   | 0.282           |
| HPV72      | 3         |                    | 59.7 (40)       | 3            | 5.0 (1.0-14.7)        | 1.6 (0.4-6.7)   | 0.522   | 0.587           |
| HPV62      | 3         |                    | 121.4 (75)      | 6            | 4.9 (1.8-10.8)        | 1.6 (0.5-4.9)   | 0.433   | 0.520           |
| HPV26      | 2B        |                    | 25.0 (16)       | 1            | 4.0 (0.1-22.3)        | 0.8 (0.1-6.7)   | 0.796   | 0.843           |
| HPV53      | 2B        |                    | 78.8 (51)       | 3            | 3.8 (0.8-11.1)        | 1.1 (0.3-4.5)   | 0.884   | 0.898           |
| HPV73      | 2B        |                    | 41.6 (29)       | 1            | 2.4 (0.1-13.4)        | 1.2 (0.1-11.7)  | 0.898   | 0.898           |
| HPV18      | 1         | 2,4,9              | 84.5 (55)       | 1            | 1.2 (0.0-6.6)         | 0.3 (0.0-2.8)   | 0.312   | 0.387           |
| HPV64      | 3         |                    | 2.8 (2)         | 0            | 0 (0.0-129.5)         | -               | -       | -               |

#IARC (International Agency for Research on Cancer) categories 1, 2, and 3 refer to carcinogenic, probably (2A)/possibly (2B) carcinogenic, and non-carcinogenic HPV respectively. Categories 1 and 2A were included in the study definition of oncogenic types. \*Vaccine types 2, 4, 9 refer to bivalent Cervarix®, quadrivalent Gardasil®, and nonavalent Gardasil®9 HPV types respectively. CI, confidence interval.

**Supplementary Table 2. Characteristics of women who remained HPV negative, and who acquired, cleared or retained HPV infection**

|                                                        | Remained negative | Mutually-Exclusive Categories |              |                | Overlapping Categories |                 |                 |
|--------------------------------------------------------|-------------------|-------------------------------|--------------|----------------|------------------------|-----------------|-----------------|
|                                                        |                   | Only Acquired                 | Only Cleared | Only Persisted | Acquired Any           | Cleared Any     | Persisted Any   |
| Median age (IQR), years                                | 25.5 (21 - 31)    | 22 (20 - 27)**                | 24 (21 - 29) | 24 (20 - 28)   | 22 (20 - 25)**         | 22 (20 - 26)*** | 22 (20 - 26)*** |
| Median age sex debut (IQR), years                      | 17 (16 - 19)      | 17 (16 - 19)                  | 17 (16 - 18) | 17 (16 - 18)   | 17 (16 - 18)           | 17 (16 - 18)    | 17 (16 - 19)    |
| Median lifetime partners (IQR), years                  | 2 (1 - 3)         | 2 (1 - 3)                     | 2 (1 - 3)    | 2 (1 - 3)      | 2 (1 - 3)              | 2 (1 - 3)       | 2 (1 - 3)       |
| Median number of sex acts in last 30 days (IQR), years | 6.5 (4 - 12)      | 6 (4 - 10)                    | 6 (4 - 10)   | 8 (4 - 10)     | 6 (3 - 10)             | 6 (3 - 10)*     | 6 (3 - 10)      |
| Contraception n, (%)                                   |                   |                               |              |                |                        |                 |                 |
| Injectable                                             | 90 (83.3)         | 72 (84.7)                     | 103 (79.2)   | 29 (87.9)      | 346 (85.4)**           | 396 (83.0)      | 207 (87.7)      |
| Oral                                                   | 12 (11.1)         | 12 (14.1)                     | 21 (16.2)    | 3 (9.1)        | 56 (13.8)              | 71 (14.9)       | 26 (11.0)       |
| Other                                                  | 6 (5.6)           | 1 (1.2)                       | 6 (4.6)      | 1 (3.0)        | 3 (0.7)                | 10 (2.1)        | 3 (1.3)         |
| Condom use n, (%)                                      |                   |                               |              |                |                        |                 |                 |
| Always                                                 | 30 (27.8)         | 26 (30.6)                     | 35 (26.9)    | 13 (39.4)      | 118 (29.1)**           | 136 (28.5)*     | 63 (26.7)**     |
| Most Times                                             | 15 (13.9)         | 13 (15.3)                     | 19 (14.6)    | 4 (12.1)       | 78 (19.3)              | 89 (18.7)       | 52 (22.0)       |
| Occasionally                                           | 34 (31.5)         | 31 (36.5)                     | 51 (39.2)    | 10 (30.3)      | 156 (38.5)             | 184 (38.6)      | 93 (39.4)       |
| Never                                                  | 29 (26.9)         | 15 (17.6)                     | 25 (19.2)    | 6 (18.2)       | 53 (13.1)              | 68 (14.3)       | 28 (11.9)       |
| Marital status n, (%)                                  |                   |                               |              |                |                        |                 |                 |
| Married                                                | 18 (16.7)         | 4 (4.7)*                      | 8 (6.2)*     | 3 (9.1)        | 10 (2.5)***            | 19 (4.0)***     | 10 (4.2)***     |
| Stable                                                 | 81 (75.0)         | 72 (84.7)                     | 116 (89.2)   | 29 (87.9)      | 368 (90.9)             | 434 (91.0)      | 213 (90.3)      |
| Other                                                  | 9 (8.3)           | 9 (10.6)                      | 6 (4.6)      | 1 (3.0)        | 27 (6.7)               | 24 (5.0)        | 13 (5.5)        |
| Living with regular partner n, (%)                     |                   |                               |              |                |                        |                 |                 |
| Yes                                                    | 33 (30.6)         | 4 (4.7)***                    | 20 (15.4)**  | 7 (21.2)       | 22 (5.4)***            | 47 (9.9)***     | 27 (11.4)***    |
| No                                                     | 72 (66.7)         | 78 (91.8)                     | 110 (84.6)   | 26 (78.8)      | 380 (93.8)             | 430 (90.1)      | 209 (88.6)      |
| Baseline STI symptoms n, (%)                           |                   |                               |              |                |                        |                 |                 |
| No                                                     | 68 (63.0)         | 58 (68.2)                     | 82 (63.1)    | 21 (63.6)      | 257 (63.5)             | 298 (62.5)      | 141 (59.7)      |
| Yes                                                    | 40 (37.0)         | 27 (31.8)                     | 48 (36.9)    | 12 (36.4)      | 148 (36.5)             | 179 (37.5)      | 95 (40.3)       |
| HSV-2 serology n, (%)                                  |                   |                               |              |                |                        |                 |                 |
| Positive                                               | 68 (63.0)         | 42 (49.4)                     | 69 (53.5)    | 20 (60.6)      | 193 (47.7)*            | 235 (49.4)      | 125 (53.0)      |
| Negative                                               | 40 (37.0)         | 41 (48.2)                     | 60 (46.5)    | 13 (39.4)      | 205 (50.6)             | 235 (49.4)      | 107 (45.3)      |
| Sex partner has other partners n, (%)                  |                   |                               |              |                |                        |                 |                 |
| Yes                                                    | 26 (24.3)         | 14 (17.1)                     | 27 (21.3)    | 4 (12.1)       | 87 (22.1)              | 105 (22.6)*     | 51 (22.6)       |
| No                                                     | 26 (24.3)         | 16 (19.5)                     | 19 (15.0)    | 5 (15.2)       | 63 (16.0)              | 67 (14.4)       | 34 (15.0)       |
| Don't know                                             | 55 (51.4)         | 52 (63.4)                     | 81 (63.8)    | 24 (72.7)      | 244 (61.9)             | 292 (62.9)      | 141 (62.4)      |

\* p<0.05; \*\* p<0.01; \*\*\* p<0.001. Factors associated with HPV were included in multivariate models assessing the relationship between HIV and/or cytokines, and HPV. IQR, Interquartile range).

**Supplementary Table 3. Tenofovir concentrations and the incidence, clearance and persistence of HPV.**

|                           | Placebo<br>(N=387) | < 1000 ng/ml<br>TFV (N =204) | ≥ 1000 ng/ml TFV<br>(N =95) | p-value |
|---------------------------|--------------------|------------------------------|-----------------------------|---------|
| Only Acquired HPV (%, n)  | 11.1 (41)          | 10.1 (20)                    | 10.8 (10)                   | 0.937   |
| Acquired any HPV (%, n)   | 55.4 (204)         | 54.6 (108)                   | 50.5 (47)                   | 0.698   |
| Only Cleared HPV (%, n)   | 17.4 (64)          | 15.7 (31)                    | 25.8 (24)                   | 0.105   |
| Cleared any HPV (%, n)    | 65.8 (242)         | 64.1 (127)                   | 71.0 (66)                   | 0.516   |
| Only Persisted HPV (%, n) | 3.5 (13)           | 6.6 (13)                     | 2.2 (2)                     | 0.161   |
| Persisted any HPV (%, n)  | 32.3 (119)         | 35.9 (71)                    | 29.0 (27)                   | 0.492   |
